# Supplementary material for: Transcriptomic Insights into the Antifungal Effects of Magnolol on the Growth and Mycotoxin Production of Alternaria alternata
Source: MDPI journal article supplement (doi:10.3390/toxins12100665), 2020-10-20
Supplement: s1 [file s1]

# Supplementary Materials: Transcriptomic Insights into the Antifungal Effects of Magnolol on the Growth and Mycotoxin Production of *Alternaria alternata*

Liuqing Wang, Duo Wang, Shuzhi Yuan, Xiaoyuan Feng and Meng Wang

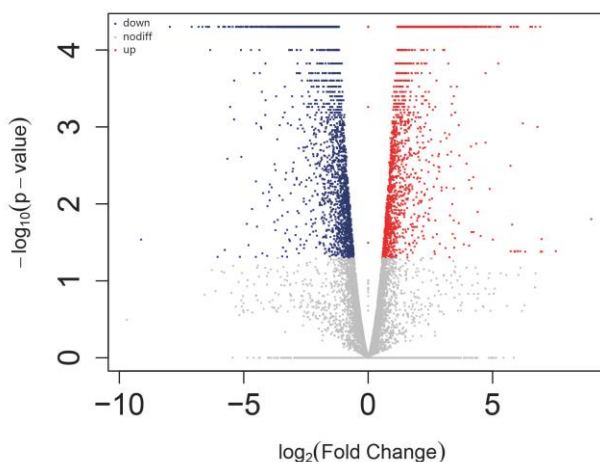

**Figure S1.** Volcano plot of these differentially expressed genes (DEGs) of *A. alternata* treated with 25  $\mu\text{M}$  of magnolol vs. control.

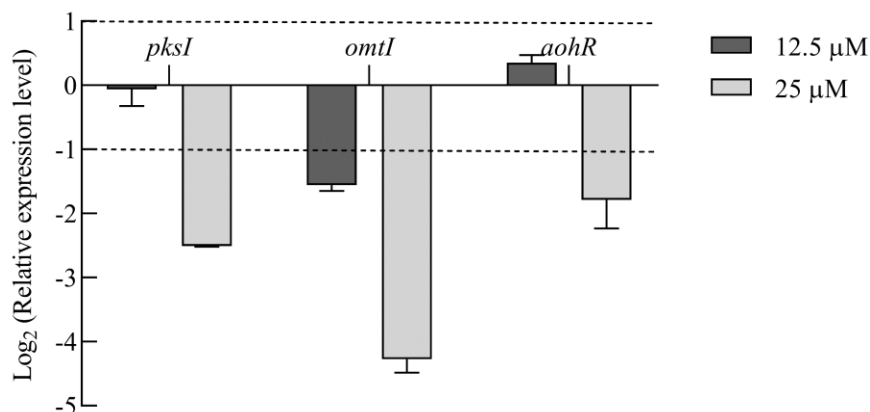

**Figure S2.** Comparative analysis of gene expression of *A. alternata* in 0, 12.5, 25  $\mu\text{M}$  of magnolol by quantitative reverse transcription PCR (qRT-PCR). Genes of *pksI*, *omtI* and *aohR* were directly responsible for AOH and AME biosynthesis and regulation in *A. alternata*.

**Table S1.** Summary of the RNA-Seq data in the control (AaC) and 25.0  $\mu$ M magnolol treated (AaM) groups of *A. alternata* ATCC 66981.

| Parameter            | AaC1       | AaC2       | AaC3       | AaM1       | AaM2       | AaM3       |
|----------------------|------------|------------|------------|------------|------------|------------|
| Raw Reads            | 43,177,416 | 39,142,004 | 32,894,838 | 30,449,858 | 25,426,692 | 36,605,620 |
| Clean Reads          | 41,119,788 | 37,963,424 | 31,906,964 | 28,276,536 | 23,238,714 | 34,370,630 |
| Clean Reads Rate (%) | 95.23      | 96.99      | 97.00      | 92.86      | 91.39      | 93.89      |
| Mapped Reads         | 23,697,435 | 21,809,297 | 19,023,683 | 15,885,293 | 12,617,501 | 20,203,599 |
| Mapping Rate (%)     | 57.63      | 57.45      | 59.62      | 56.18      | 54.30      | 58.78      |
| MultiMap Reads       | 95,684     | 80,040     | 89,944     | 46,424     | 36,212     | 73,576     |
| MultiMap Rate (%)    | 0.40       | 0.37       | 0.47       | 0.29       | 0.29       | 0.36       |
| Q20 (%)              | 94.80      | 95.21      | 95.20      | 93.53      | 92.85      | 93.87      |
| Q30 (%)              | 90.21      | 90.50      | 90.22      | 88.63      | 87.86      | 88.72      |
| GC content (%)       | 52.93      | 53.33      | 53.13      | 52.69      | 52.74      | 53.27      |
